# Supplementary material for: Purine-crosslinked injectable chitosan sponges promote oligodendrocyte progenitor cells’ attachment and differentiation
Source: Royal Society of Chemistry journal article supplement (doi:10.1039/c4bm00215f), 2014-09-15
Supplement: c4bm00215f1.pdf [file c4bm00215f1.pdf]

### Supplementary Figure

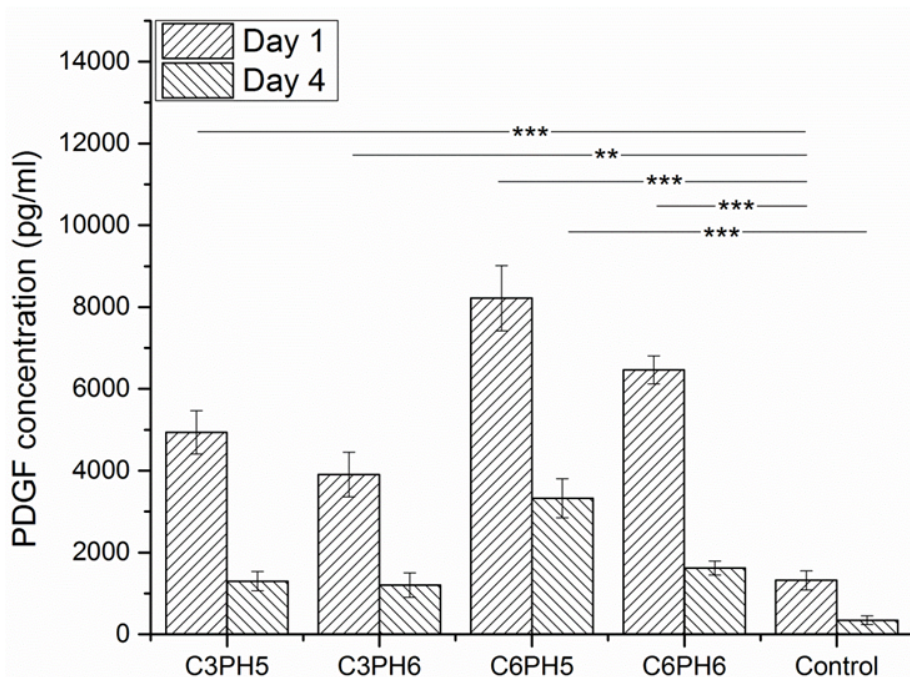

**Fig.S1** PDGF availability (pg/ml) in the media in the presence of the sponges and the poly(ornithine)-coated cover slips (control) after 1 and 4 days. The PDGF concentration at day 1 in the presence of the all sponge formulations was significantly higher than the control. At day 4, C6PH5 had significantly higher PDGF in the media compared to controls. Values represent mean  $\pm$  SEM (n = 3, \*P < 0.05, \*\* P < 0.01, \*\*\* P < 0.001).
